# Supplementary material
Source: PubMed Central journal article supplement (PMC11524789)
Supplement: NIHMS2001594-supplement-Supplementary_Tables_1_and_2.pdf [file NIHMS2001594-supplement-Supplementary_Tables_1_and_2.pdf]

**Supplemental Table 1.** Patient characteristics in study groups included in blood transcriptomics and plasma metabolomics.

| Characteristics                         | Blood transcriptomics |                      | Plasma metabolomics  |                         |                      |
|-----------------------------------------|-----------------------|----------------------|----------------------|-------------------------|----------------------|
|                                         | Cyanotic CHD (n=11)   | Control (n=11)       | Cyanotic CHD (n=27)  | Non-cyanotic CHD (n=11) | Control (n=12)       |
| Female, n (%)                           | 6 (0.55)              | 6 (0.55)             | 14 (0.52)            | 6 (0.55)                | 6 (0.50)             |
| Gestational age, weeks, median (IQR)    | 37<br>(36.5, 37)      | 35 (34,37)           | N/A                  | N/A                     | 34<br>(34,35)        |
| Age at collection, months, median (IQR) | 0.09<br>(0.04, 0.25)  | 0.08<br>(0.06, 0.13) | 0.25<br>(0.13, 1.38) | 6<br>(4-7.5)            | 0.13<br>(0.07, 0.87) |
| <b>Cardiac phenotypes</b>               |                       |                      |                      |                         |                      |
| Atrioventricular septal defect          | 1                     |                      | 1                    | -                       |                      |
| Hypoplastic left heart syndrome         | 2                     |                      | 5                    | -                       |                      |
| Pulmonary atresia                       | 4                     |                      | 5                    | -                       |                      |
| Transposition of the great arteries     | 3                     |                      | 3                    | -                       |                      |
| Truncus arteriosus                      | -                     |                      | 2                    | -                       |                      |
| Other single ventricle                  | -                     |                      | 3                    | -                       |                      |
| Tetralogy of fallot/DORV                | 1                     |                      | 8                    | 6                       |                      |
| Aortic stenosis                         | -                     |                      | -                    | 1                       |                      |
| Ventricular septal defect               | -                     |                      | -                    | 4                       |                      |

Note: Tetralogy of fallot/double outlet right ventricle (DORV) patients defined as cyanotic ( $\text{SaO}_2 < 92\%$ ) or non-cyanotic ( $\text{SaO}_2 \geq 92\%$ ). CHD, congenital heart disease; N/A, not available; IQR, interquartile range.

**Supplemental Table 2.** Comparison of intermediate levels in glycolysis, citric acid cycle, and fatty acid metabolism (medium- and long-chain acylcarnitines) between **A)** females vs. males within each study cohort of cyanotic CHD cases, non-cyanotic (normoxic) CHD cases, and controls without CHD; **B)** cyanotic CHD vs. controls without CHD; and **C)** cyanotic vs. non-cyanotic CHD cases.

| A Intermediates                               | Cyanotic CHD F:M |               |         | Non-cyanotic CHD F:M |         |         | Controls F:M   |         |         |
|-----------------------------------------------|------------------|---------------|---------|----------------------|---------|---------|----------------|---------|---------|
|                                               | Fold of Change   | p-value       | q-value | Fold of Change       | p-value | q-value | Fold of Change | p-value | q-value |
| <i>Glycolysis</i>                             |                  |               |         |                      |         |         |                |         |         |
| 1,5-anhydroglucitol                           | <b>1.82</b>      | <b>0.0283</b> | 0.4585  | <b>0.25</b>          | 0.0133  | 0.2991  | 1.18           | 0.7600  | 0.9980  |
| Glucose                                       | 1.09             | 0.3753        | 0.6368  | 0.99                 | 0.9840  | 0.6867  | 1.10           | 0.4216  | 0.9980  |
| 2,3-diphosphoglycerate                        | <b>5.56</b>      | <b>0.0158</b> | 0.4585  | 0.71                 | 0.3029  | 0.5059  | 1.56           | 0.4197  | 0.9980  |
| 3-phosphoglycerate                            | <b>2.13</b>      | <b>0.0283</b> | 0.4585  | 0.48                 | 0.1385  | 0.4209  | 0.65           | 0.6435  | 0.9980  |
| Pyruvate                                      | 0.98             | 0.7505        | 0.7755  | <b>0.71</b>          | 0.0384  | 0.3680  | 0.88           | 0.8888  | 0.9980  |
| Lactate                                       | 1.15             | 0.1875        | 0.5258  | 0.82                 | 0.4562  | 0.5461  | 1.04           | 0.7035  | 0.9980  |
| Glycerate                                     | 1.03             | 0.7001        | 0.7591  | <b>1.47</b>          | 0.0473  | 0.3748  | 1.12           | 0.5283  | 0.9980  |
| <i>Citric Acid Cycle</i>                      |                  |               |         |                      |         |         |                |         |         |
| Citrate                                       | 1.18             | 0.0577        | 0.4585  | 0.92                 | 0.4485  | 0.5444  | 1.04           | 0.5965  | 0.9980  |
| Isocitrate                                    | <b>1.39</b>      | <b>0.0158</b> | 0.4585  | 0.88                 | 0.5096  | 0.5590  | 0.97           | 0.9907  | 0.9980  |
| $\alpha$ -ketoglutarate                       | 1.25             | 0.5398        | 0.7241  | 0.88                 | 0.7261  | 0.6307  | 1.52           | 0.2418  | 0.9980  |
| Succinate                                     | 1.15             | 0.6517        | 0.7421  | 0.91                 | 0.9997  | 0.6933  | 1.00           | 0.8719  | 0.9980  |
| Fumarate                                      | 1.01             | 0.8131        | 0.7802  | 1.08                 | 0.6049  | 0.5889  | 1.25           | 0.2662  | 0.9980  |
| Malate                                        | 1.03             | 0.8682        | 0.7951  | 0.95                 | 0.8504  | 0.6643  | 1.09           | 0.5351  | 0.9980  |
| 2-methylcitrate                               | 0.85             | 0.3033        | 0.5977  | 1.30                 | 0.1672  | 0.4512  | 1.54           | 0.2653  | 0.9980  |
| <i>Glutamine</i>                              |                  |               |         |                      |         |         |                |         |         |
| Glutamine                                     | 1.01             | 0.9989        | 0.8182  | 1.01                 | 0.9661  | 0.6803  | 1.19           | 0.5163  | 0.9980  |
| Glutamate                                     | 1.33             | 0.0947        | 0.4814  | 1.03                 | 0.7466  | 0.6367  | 0.95           | 0.7146  | 0.9980  |
| $\alpha$ -ketoglutaramate                     | 0.95             | 0.3860        | 0.6391  | 1.12                 | 0.2237  | 0.4634  | 0.85           | 0.9570  | 0.9980  |
| <i>Fatty Acid Metabolism (Acylcarnitines)</i> |                  |               |         |                      |         |         |                |         |         |
| Myristoylcarnitine (C14)                      | 1.59             | 0.0879        | 0.4814  | 1.04                 | 0.7837  | 0.6427  | 1.27           | 0.3894  | 0.9980  |
| Palmitoylcarnitine (C16)                      | 1.45             | 0.0803        | 0.4814  | 1.10                 | 0.2996  | 0.5035  | 1.25           | 0.6464  | 0.9980  |
| Stearoylcarnitine (C18)                       | <b>1.56</b>      | <b>0.0262</b> | 0.4585  | 0.81                 | 0.2029  | 0.4613  | 1.49           | 0.1718  | 0.9980  |
| Lignoceroylcarnitine (C24)                    | 1.67             | 0.1779        | 0.5242  | 0.91                 | 0.4759  | 0.5469  | 1.12           | 0.9633  | 0.9980  |
| Cerotoylcarnitine (C26)                       | <b>2.08</b>      | <b>0.0424</b> | 0.4585  | 0.83                 | 0.4036  | 0.5296  | 1.25           | 0.5146  | 0.9980  |

**B**

| Intermediates                                 | Cyanotic CHD vs. Non-cyanotic CHD |                            |                            | Cyanotic CHD vs. Non-cyanotic CHD<br>(males) |                            |                            | Cyanotic CHD vs. Non-cyanotic CHD<br>(females) |                            |               |
|-----------------------------------------------|-----------------------------------|----------------------------|----------------------------|----------------------------------------------|----------------------------|----------------------------|------------------------------------------------|----------------------------|---------------|
|                                               | Fold of Change                    | p-value                    | q-value                    | Fold of Change                               | p-value                    | q-value                    | Fold of Change                                 | p-value                    | q-value       |
| <i>Glycolysis</i>                             |                                   |                            |                            |                                              |                            |                            |                                                |                            |               |
| 1,5-anhydroglucitol                           | <b>0.19</b>                       | <b>4.1x10<sup>-5</sup></b> | <b>6.6x10<sup>-5</sup></b> | <b>0.08</b>                                  | <b>0.0001</b>              | <b>0.0003</b>              | <b>0.58</b>                                    | <b>0.0105</b>              | <b>0.0235</b> |
| Glucose                                       | 0.96                              | 0.2657                     | 0.0983                     | 0.91                                         | 0.2842                     | 0.0931                     | 1.00                                           | 0.7312                     | 0.3939        |
| 2,3-diphosphoglycerate                        | 3.49                              | 0.1991                     | 0.0782                     | 0.87                                         | 0.3146                     | 0.1006                     | <b>6.84</b>                                    | <b>0.0247</b>              | <b>0.0389</b> |
| 3-phosphoglycerate                            | 1.71                              | 0.0656                     | 0.0316                     | 0.77                                         | 0.6721                     | 0.1720                     | <b>3.44</b>                                    | <b>0.0075</b>              | <b>0.0194</b> |
| Pyruvate                                      | 0.98                              | 0.3447                     | 0.1195                     | 0.84                                         | 0.1419                     | 0.0570                     | 1.15                                           | 0.9289                     | 0.4496        |
| Lactate                                       | <b>1.32</b>                       | <b>0.0113</b>              | <b>0.0073</b>              | 1.10                                         | 0.5288                     | 0.1450                     | <b>1.54</b>                                    | <b>0.0005</b>              | <b>0.0075</b> |
| Glycerate                                     | 1.09                              | 0.3733                     | 0.1271                     | 1.34                                         | 0.0995                     | 0.0440                     | 0.94                                           | 0.6048                     | 0.3506        |
| <i>Citric Acid Cycle</i>                      |                                   |                            |                            |                                              |                            |                            |                                                |                            |               |
| Citrate                                       | <b>0.86</b>                       | <b>0.0141</b>              | <b>0.0088</b>              | <b>0.75</b>                                  | <b>0.0188</b>              | <b>0.0128</b>              | 0.96                                           | 0.5077                     | 0.3074        |
| Isocitrate                                    | <b>0.74</b>                       | <b>0.0020</b>              | <b>0.0017</b>              | <b>0.58</b>                                  | <b>0.0090</b>              | <b>0.0069</b>              | 0.91                                           | 0.2699                     | 0.2046        |
| $\alpha$ -ketoglutarate                       | <b>1.57</b>                       | <b>0.0086</b>              | <b>0.0058</b>              | 1.31                                         | 0.2541                     | 0.0861                     | <b>1.84</b>                                    | <b>0.0184</b>              | <b>0.0316</b> |
| Succinate                                     | <b>2.97</b>                       | <b>1.5x10<sup>-7</sup></b> | <b>1.1x10<sup>-6</sup></b> | <b>2.61</b>                                  | <b>0.0098</b>              | <b>0.0074</b>              | <b>3.32</b>                                    | <b>1.7x10<sup>-5</sup></b> | <b>0.0020</b> |
| Fumarate                                      | 1.24                              | 0.1120                     | 0.0483                     | 1.29                                         | 0.2467                     | 0.0845                     | 1.21                                           | 0.3702                     | 0.2474        |
| Malate                                        | <b>1.36</b>                       | <b>0.0346</b>              | <b>0.0187</b>              | 1.30                                         | 0.2379                     | 0.0825                     | 1.41                                           | 0.0772                     | 0.0874        |
| 2-methylcitrate                               | <b>2.81</b>                       | <b>2.3x10<sup>-6</sup></b> | <b>7.1x10<sup>-6</sup></b> | <b>3.56</b>                                  | <b>1.8x10<sup>-5</sup></b> | <b>0.0001</b>              | <b>2.31</b>                                    | <b>0.0187</b>              | <b>0.0320</b> |
| <i>Glutamine Metabolism</i>                   |                                   |                            |                            |                                              |                            |                            |                                                |                            |               |
| Glutamine                                     | 1.00                              | 0.6184                     | 0.1878                     | 1.00                                         | 0.7243                     | 0.1819                     | 0.99                                           | 0.7375                     | 0.3959        |
| Glutamate                                     | <b>0.81</b>                       | <b>0.0098</b>              | <b>0.0064</b>              | <b>0.70</b>                                  | <b>0.0364</b>              | <b>0.0208</b>              | 0.90                                           | 0.2278                     | 0.1827        |
| $\alpha$ -ketoglutaramate                     | <b>2.29</b>                       | <b>4.0x10<sup>-8</sup></b> | <b>5.1x10<sup>-7</sup></b> | <b>2.12</b>                                  | <b>8.5x10<sup>-6</sup></b> | <b>7.8x10<sup>-5</sup></b> | <b>1.99</b>                                    | <b>0.0033</b>              | <b>0.0130</b> |
| <i>Fatty Acid Metabolism (Acylcarnitines)</i> |                                   |                            |                            |                                              |                            |                            |                                                |                            |               |
| Myristoylcarnitine (C14)                      | 0.97                              | 0.1119                     | 0.0483                     | 0.76                                         | 0.0621                     | 0.0307                     | 1.16                                           | 0.8140                     | 0.4175        |
| Palmitoylcarnitine (C16)                      | 1.00                              | 0.2183                     | 0.0839                     | 0.86                                         | 0.0995                     | 0.0440                     | 1.12                                           | 0.9515                     | 0.4551        |
| Stearoylcarnitine (C18)                       | <b>0.77</b>                       | <b>0.0045</b>              | <b>0.0034</b>              | <b>0.53</b>                                  | <b>0.0014</b>              | <b>0.0017</b>              | 1.03                                           | 0.6345                     | 0.3593        |
| Lignoceroylcarnitine (C24)                    | <b>0.38</b>                       | <b>9.5x10<sup>-9</sup></b> | <b>1.8x10<sup>-7</sup></b> | <b>0.27</b>                                  | <b>4.4x10<sup>-6</sup></b> | <b>0.0001</b>              | <b>0.49</b>                                    | <b>0.0006</b>              | <b>0.0075</b> |
| Cerotoylcarnitine (C26)                       | <b>0.34</b>                       | <b>4.0x10<sup>-9</sup></b> | <b>1.3x10<sup>-7</sup></b> | <b>0.20</b>                                  | <b>2.2x10<sup>-6</sup></b> | <b>0.0001</b>              | <b>0.50</b>                                    | <b>0.0007</b>              | <b>0.0075</b> |
